# Supplementary figures and images for: Interplay of Ecological Opportunities and Functional Traits Drives the Evolution and Diversification of Millettiod Legumes (Fabaceae)
Source: MDPI journal article supplement (doi:10.3390/genes13122220), 2022-11-27

Figure 4-4B

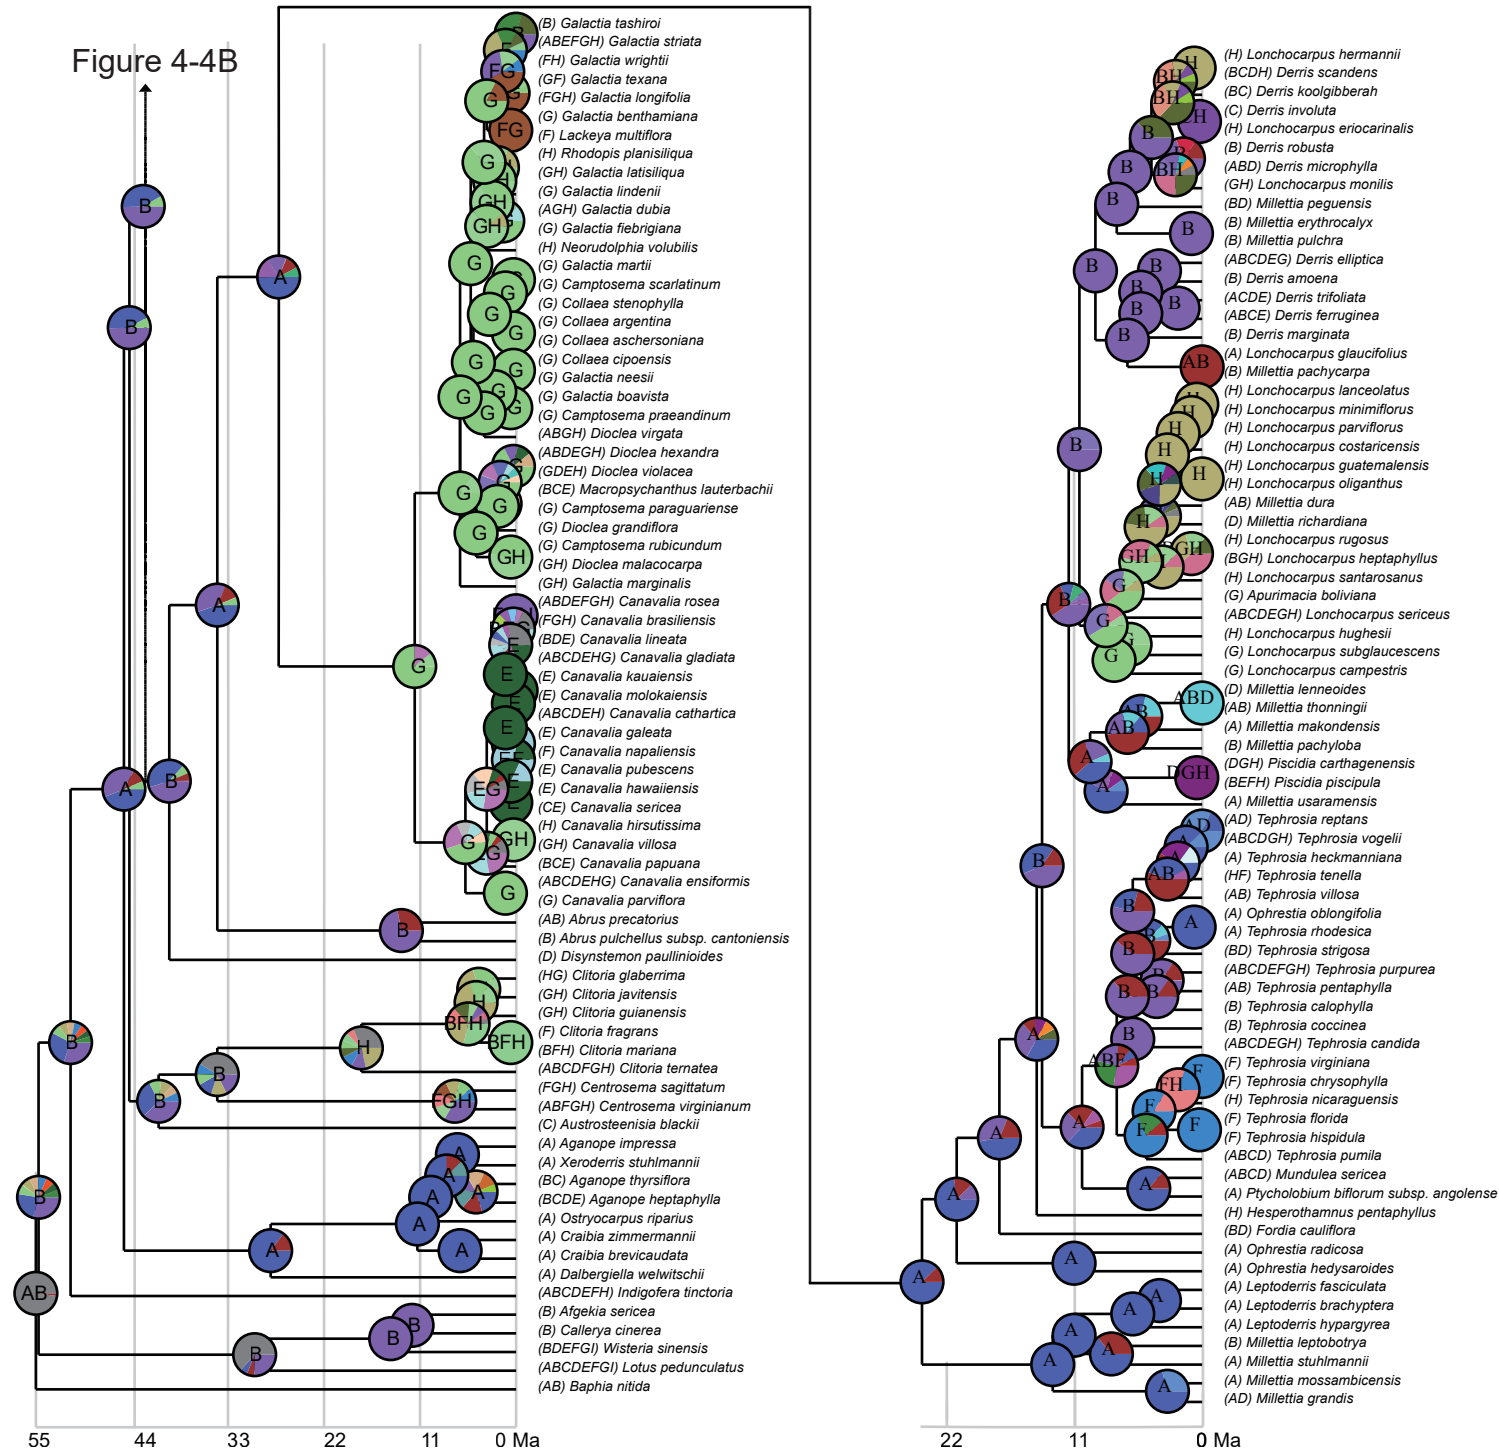

Figure 4-4A

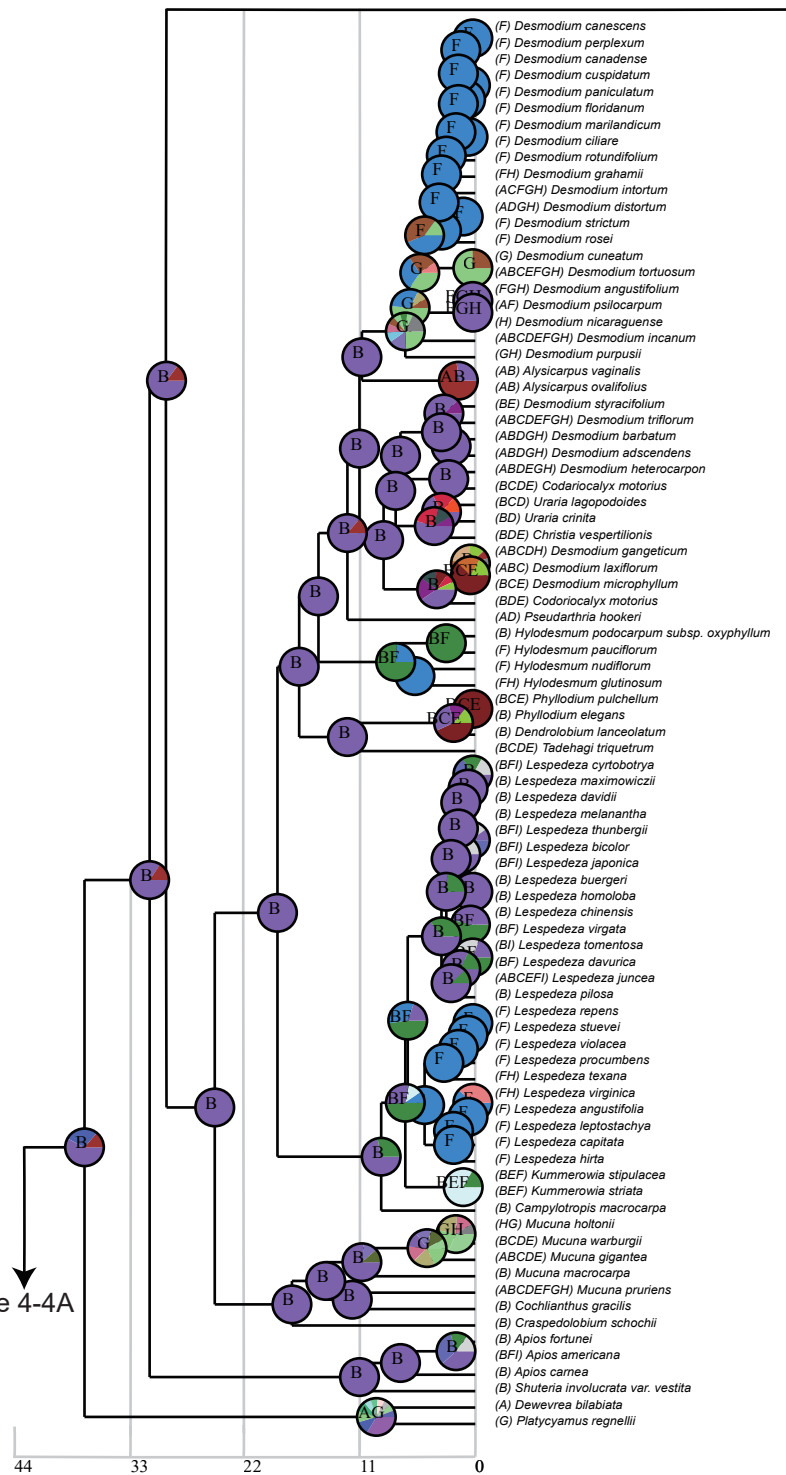

Figure 4-4C

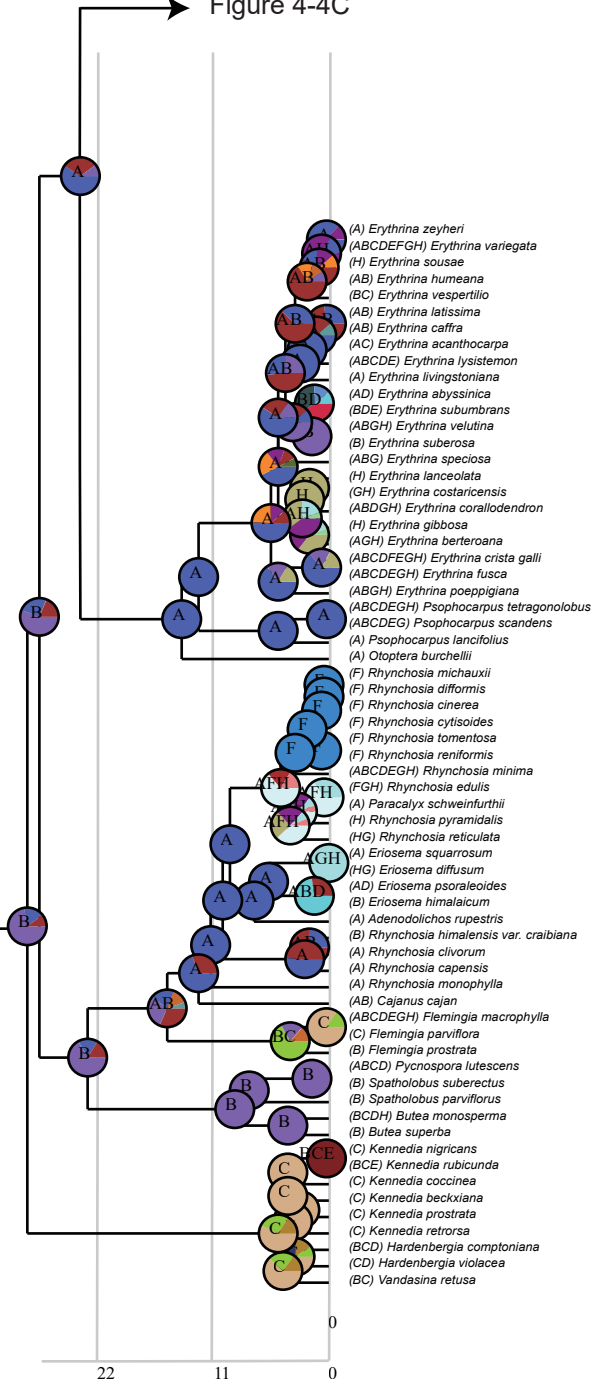

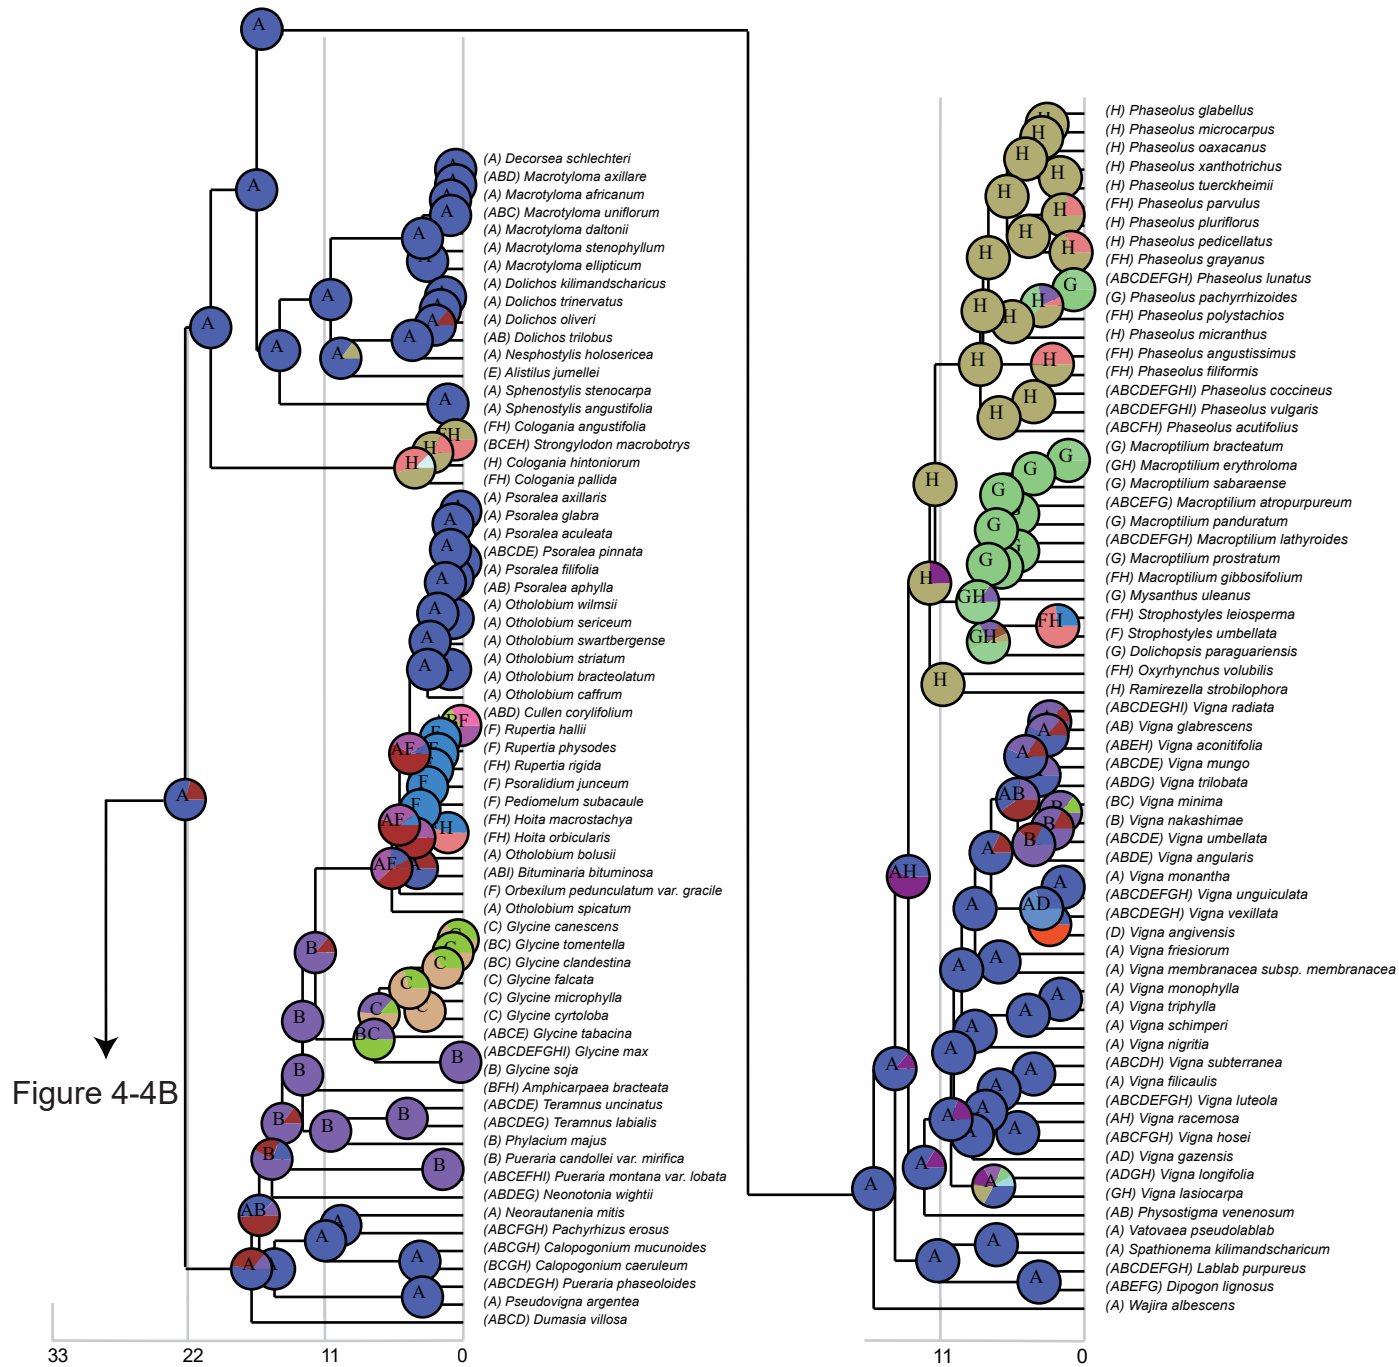

Supplement: s1 [file s1]

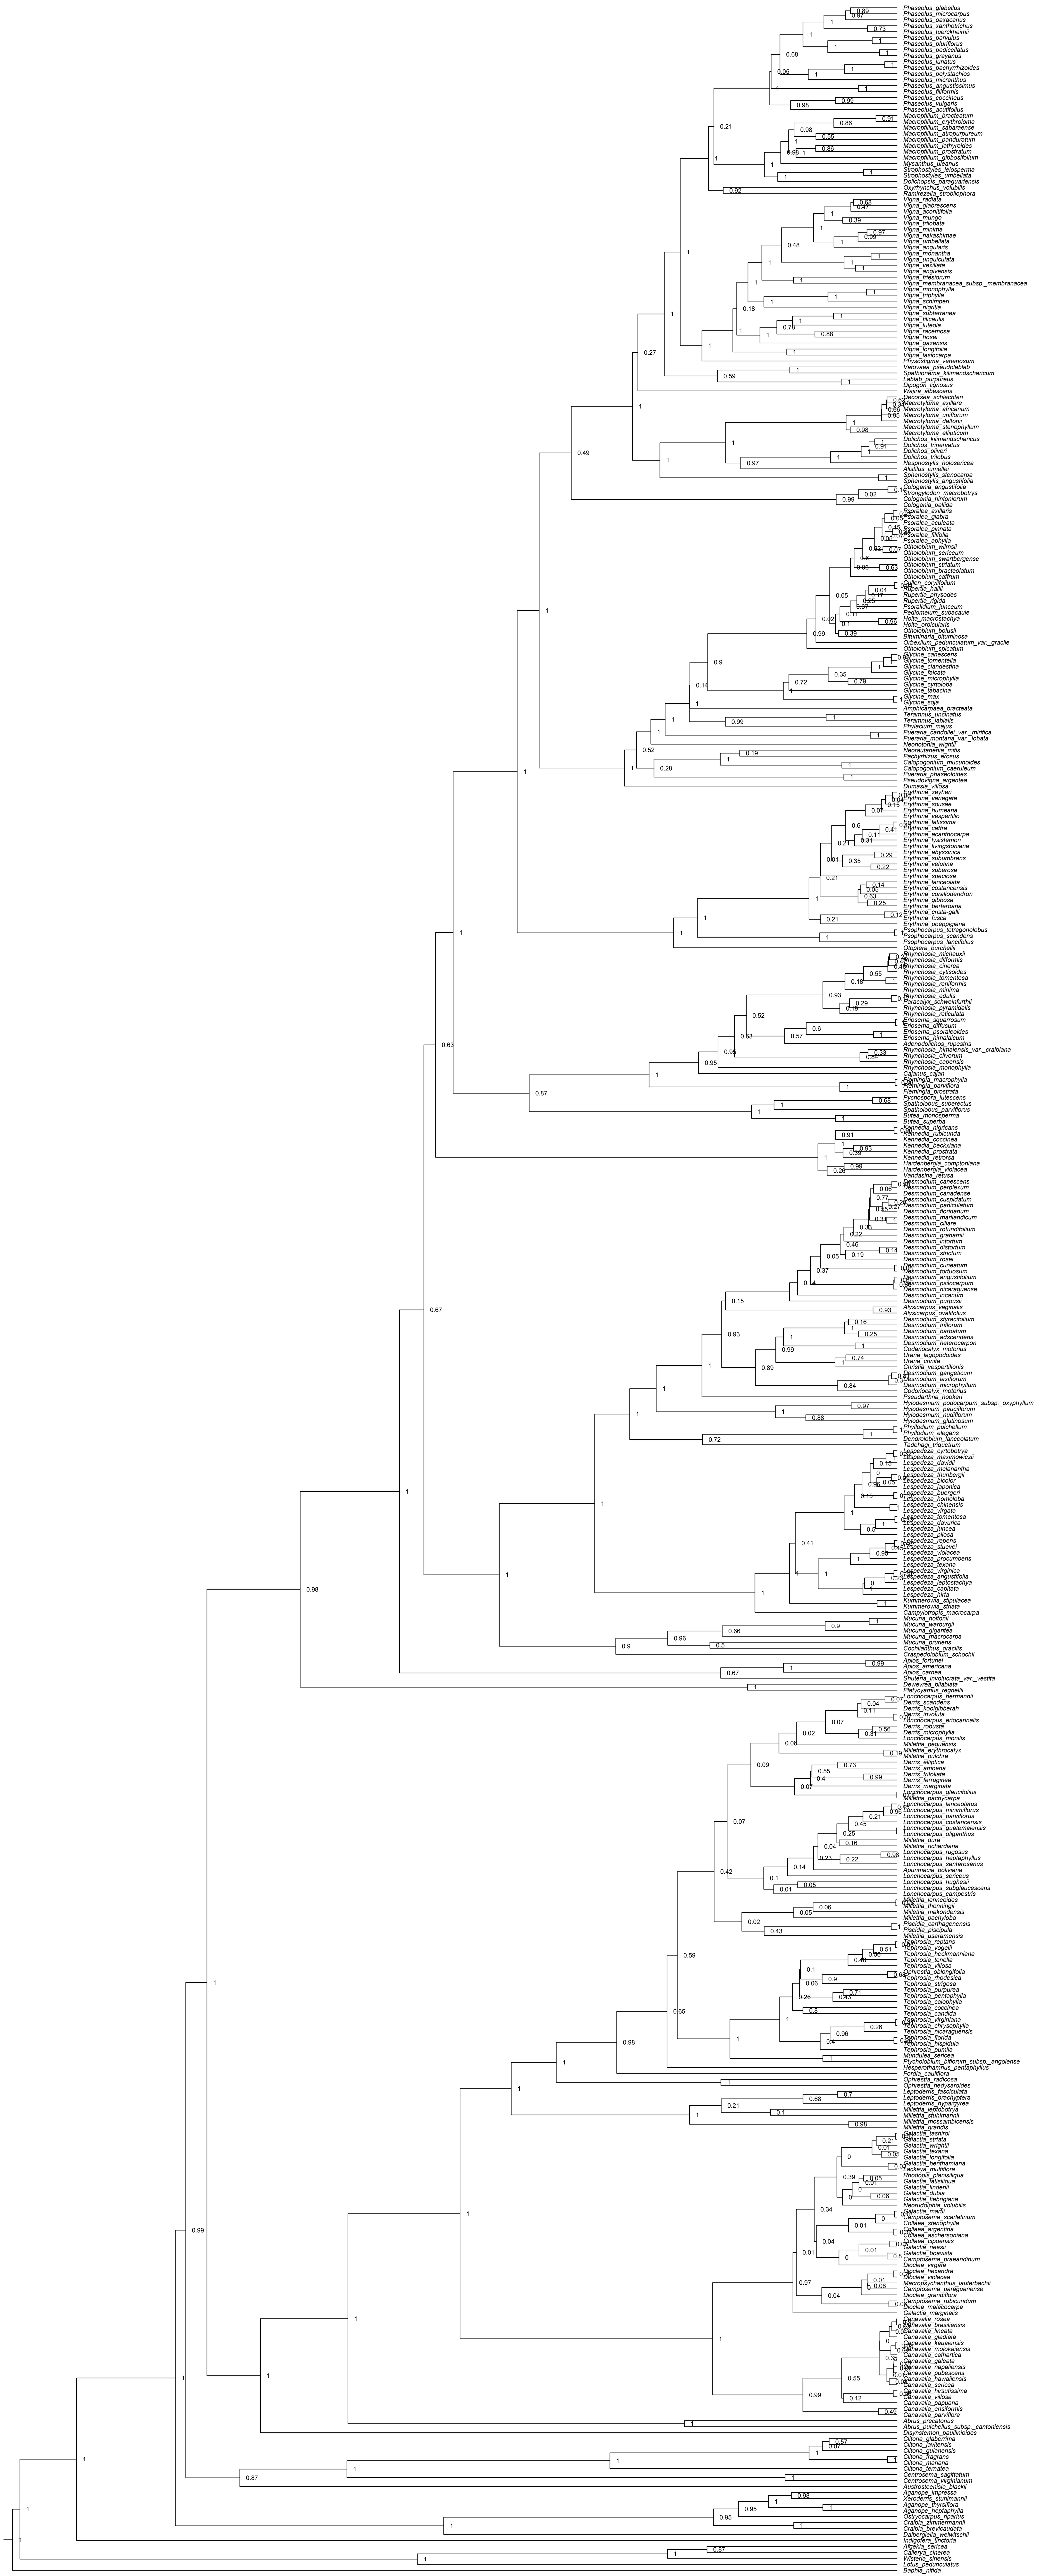

Supplement: s1 [file s1]

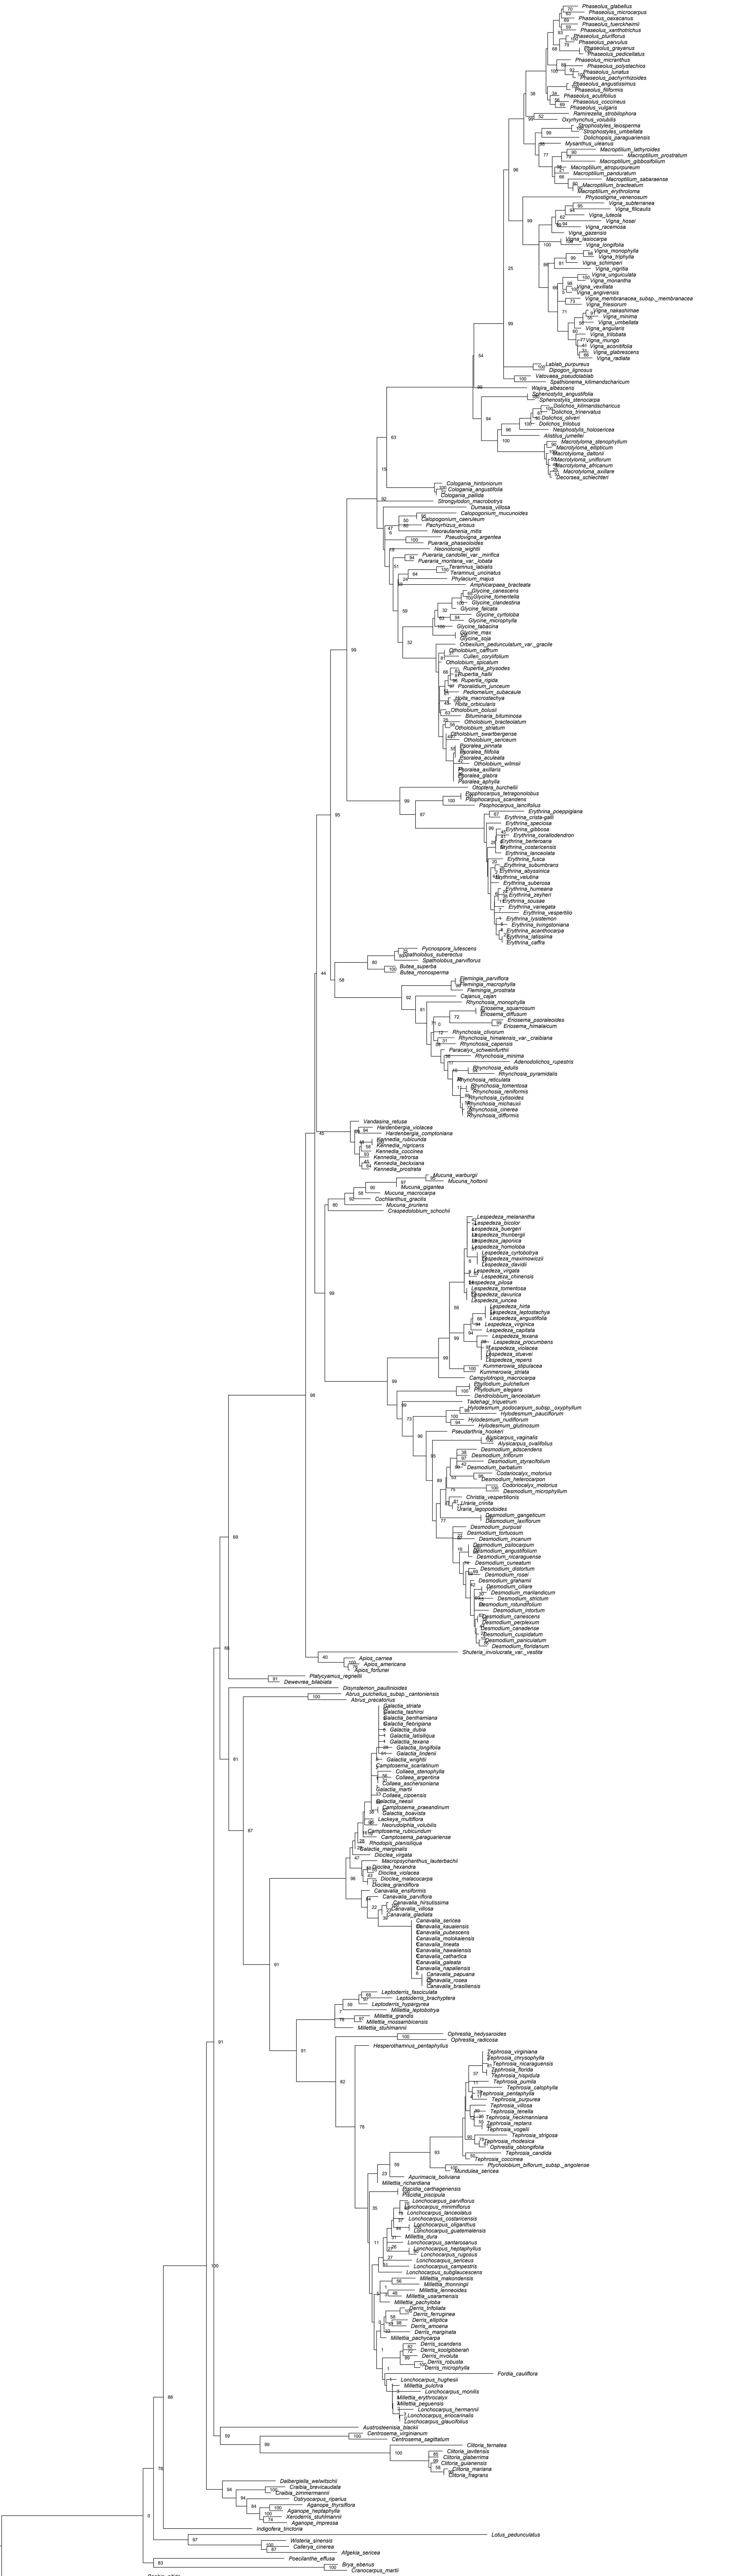

Supplement: s1 [file s1]

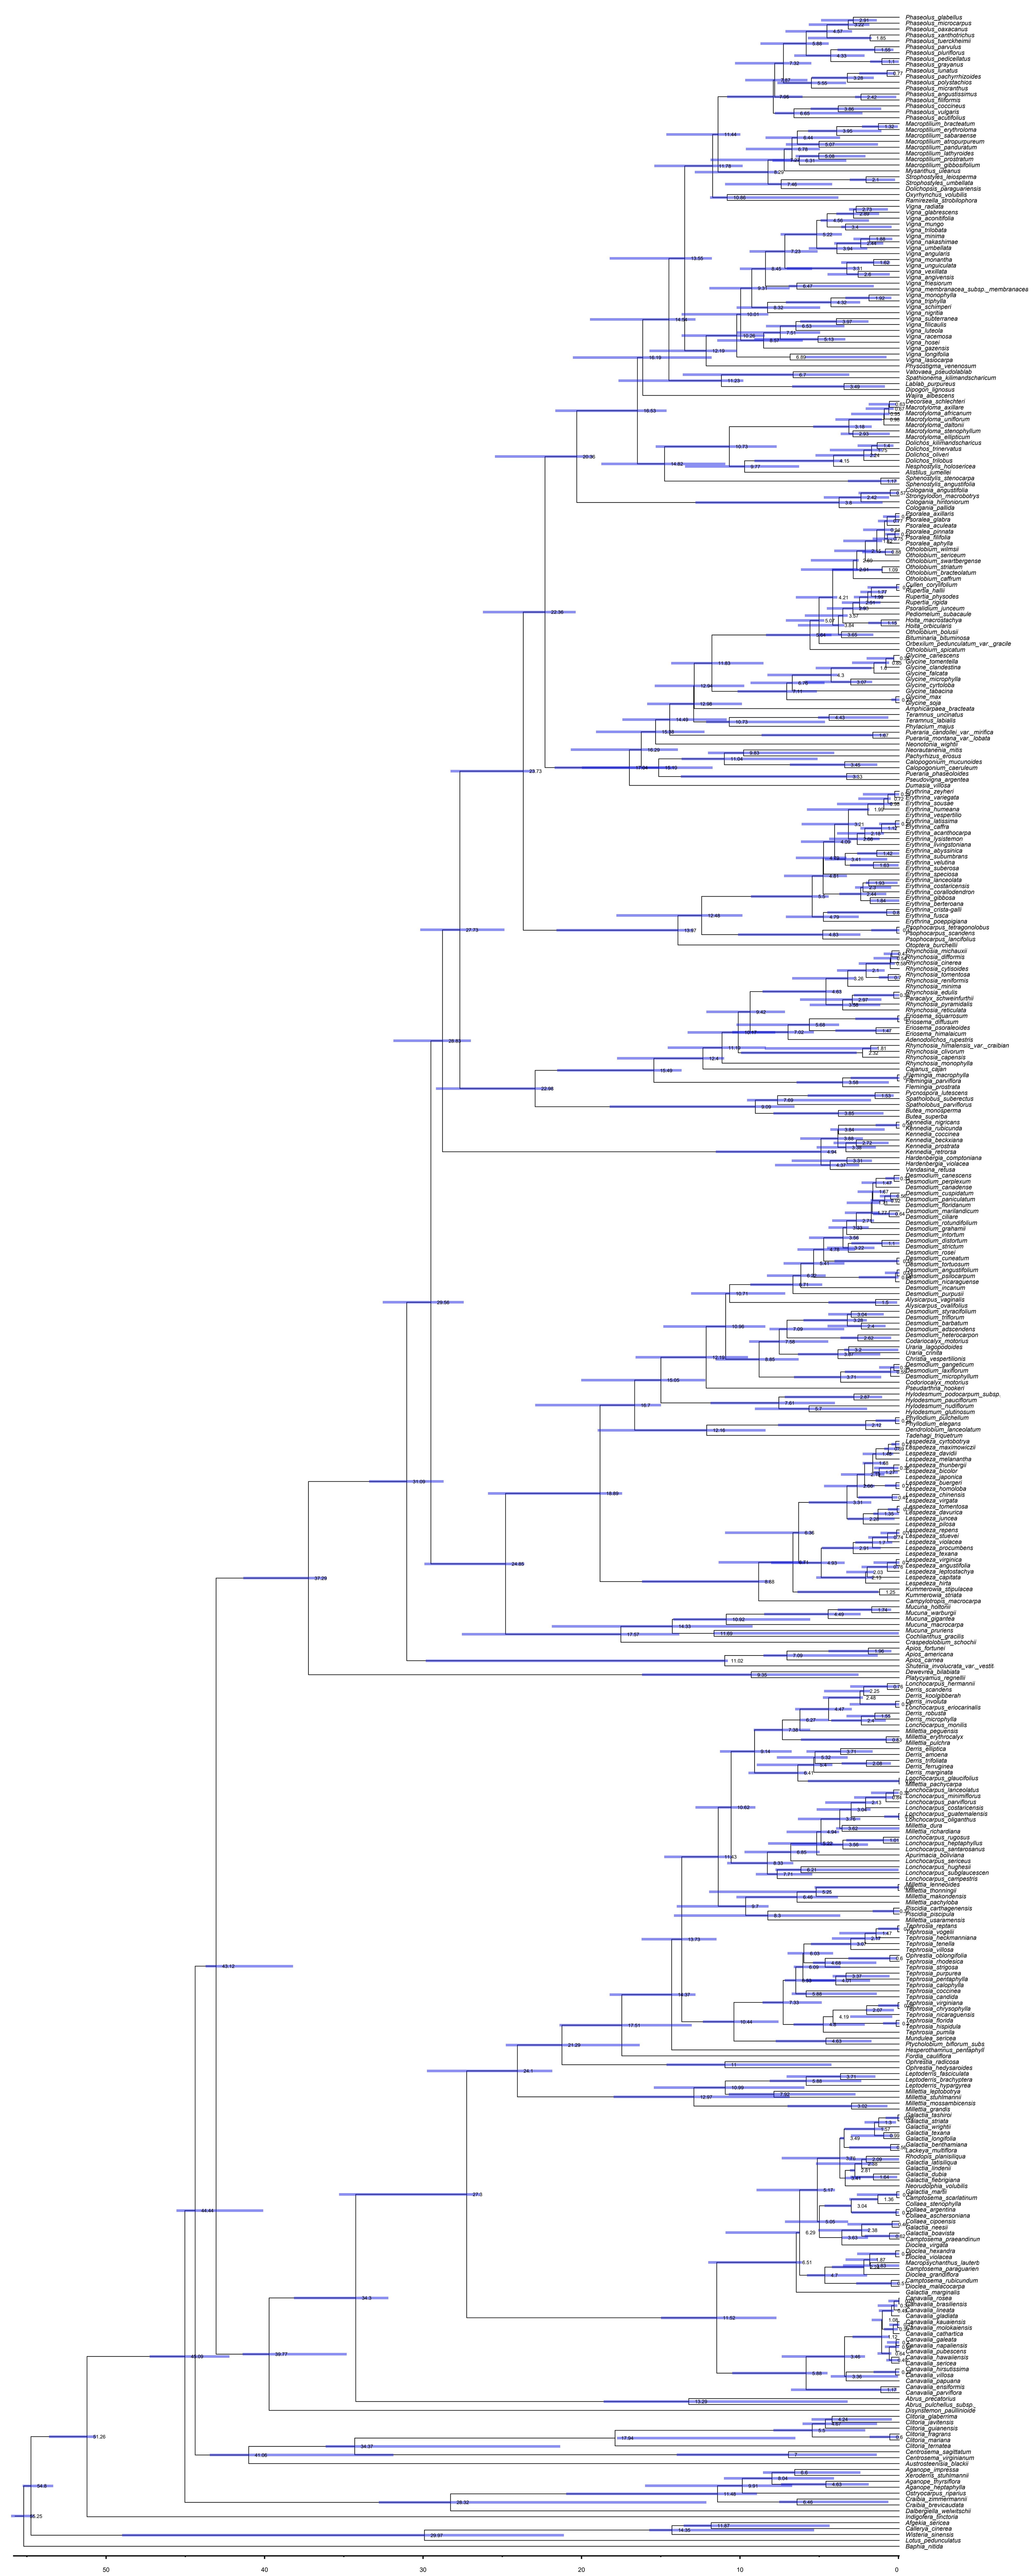

Supplement: s1 [file s1]
